# Supplementary material for: Metal–insulator transition tuned by magnetic field in Bi1.7V8O16hollandite
Source: Royal Society of Chemistry journal article supplement (doi:10.1039/c7tc00487g), 2017-01-01
Supplement: c7tc00487g1.pdf [file c7tc00487g1.pdf]

## Metal-insulator transition tuned by magnetic field in $\text{Bi}_{1.7}\text{V}_8\text{O}_{16}$ hollandite

Amber M. Larson, Brandon Wilfong, Pouya Moetakef, Craig M. Brown,  
Peter Zavalij, and Efrain E. Rodriguez

Electronic Supporting Information

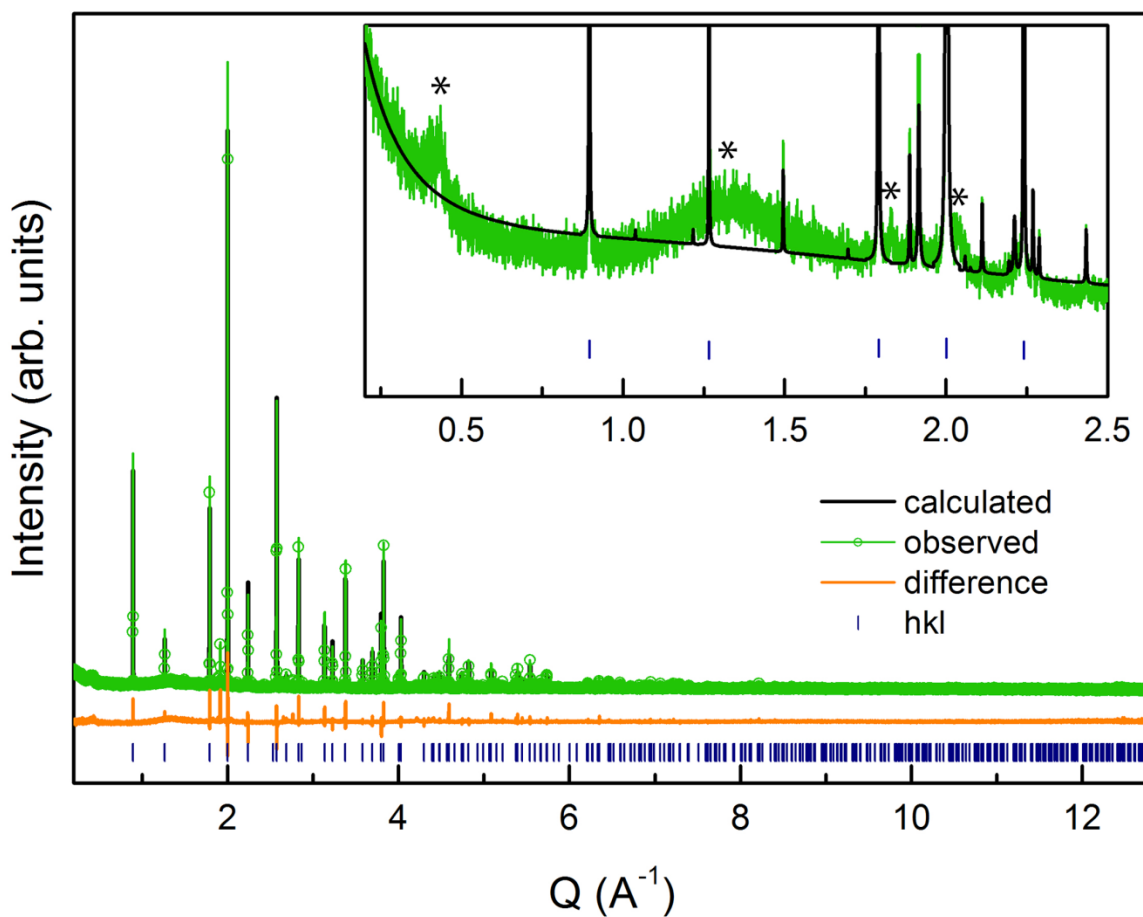

**Figure S1:** Room temperature Rietveld refinement of synchrotron X-ray diffraction data (11BM). Observed data is in green, calculated fit is in black, the difference curve is orange, and expected  $hkl$  peak locations are in navy. Refinement was carried out with all five temperature datasets simultaneously.  $R_{wp} = 17.84\%$ . The inset shows the low  $Q$  region, where satellite peaks corresponding to a charge density wave (CDW) with a propagation vector of  $\mathbf{q} = (0\ 0\ 0.20(1))$  are indicated with asterisks. The broad satellite close to  $\sim 1.3\ \text{\AA}^{-1}$  in  $Q$  corresponds to that of the (002) reflection.

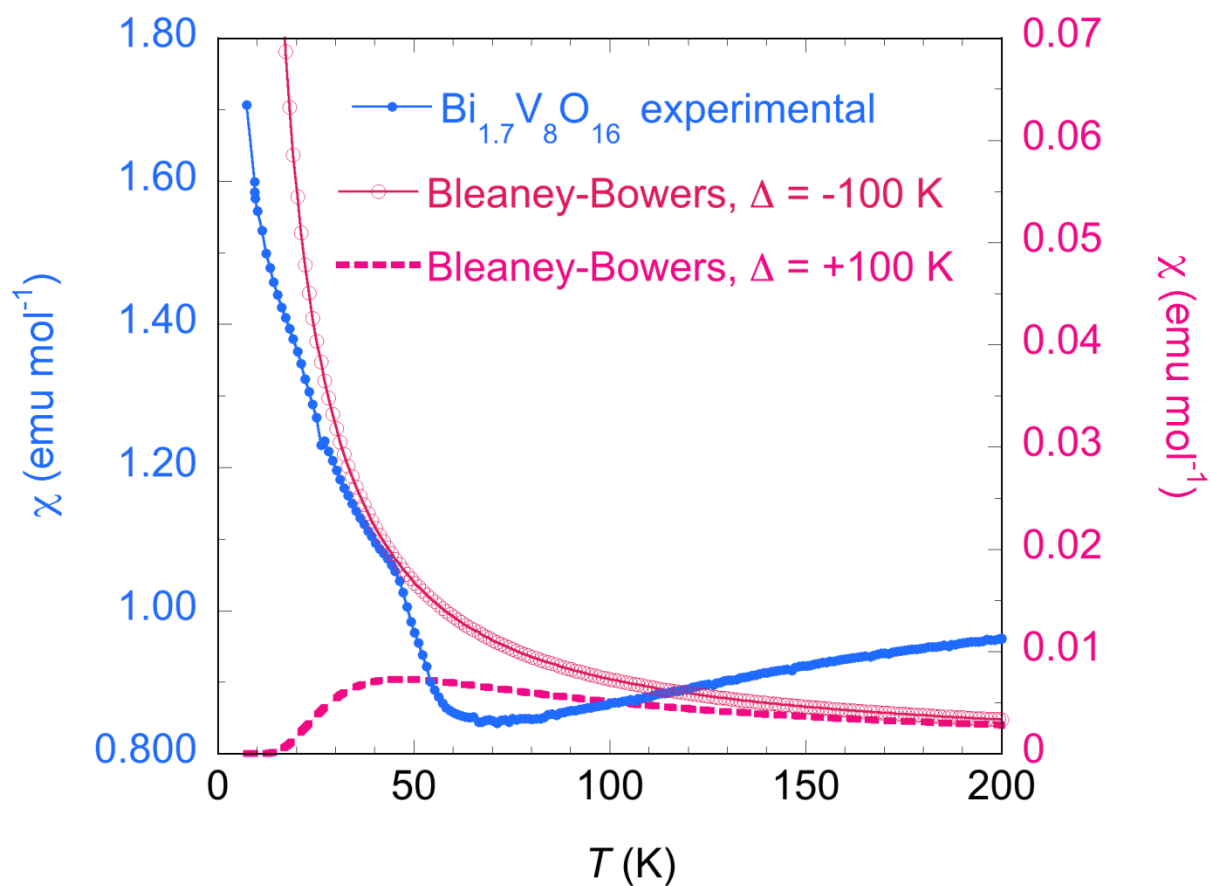

**Figure S2:** Magnetic susceptibilities for the Bleaney-Bowers model juxtaposed with the observed magnetic susceptibility for  $\text{Bi}_{1.7}\text{V}_8\text{O}_{16}$ . The models are presented for the ferromagnetic case where  $\Delta = -100$  K and the antiferromagnetic case where  $\Delta = 100$  K.
